# Supplementary material for: Prognostic nomogram for hepatocellular carcinoma with fibrosis of varying degrees: a retrospective cohort study
Source: PubMed Central journal article supplement — Ann Transl Med. 2020 Nov;8(21):1429. doi: 10.21037/atm-20-3267 (PMC7723572; doi:10.21037/atm-20-3267), 2020-11
Supplement: atm-08-21-1429-supplementary.pdf [file atm-08-21-1429-supplementary.pdf]

Supplementary

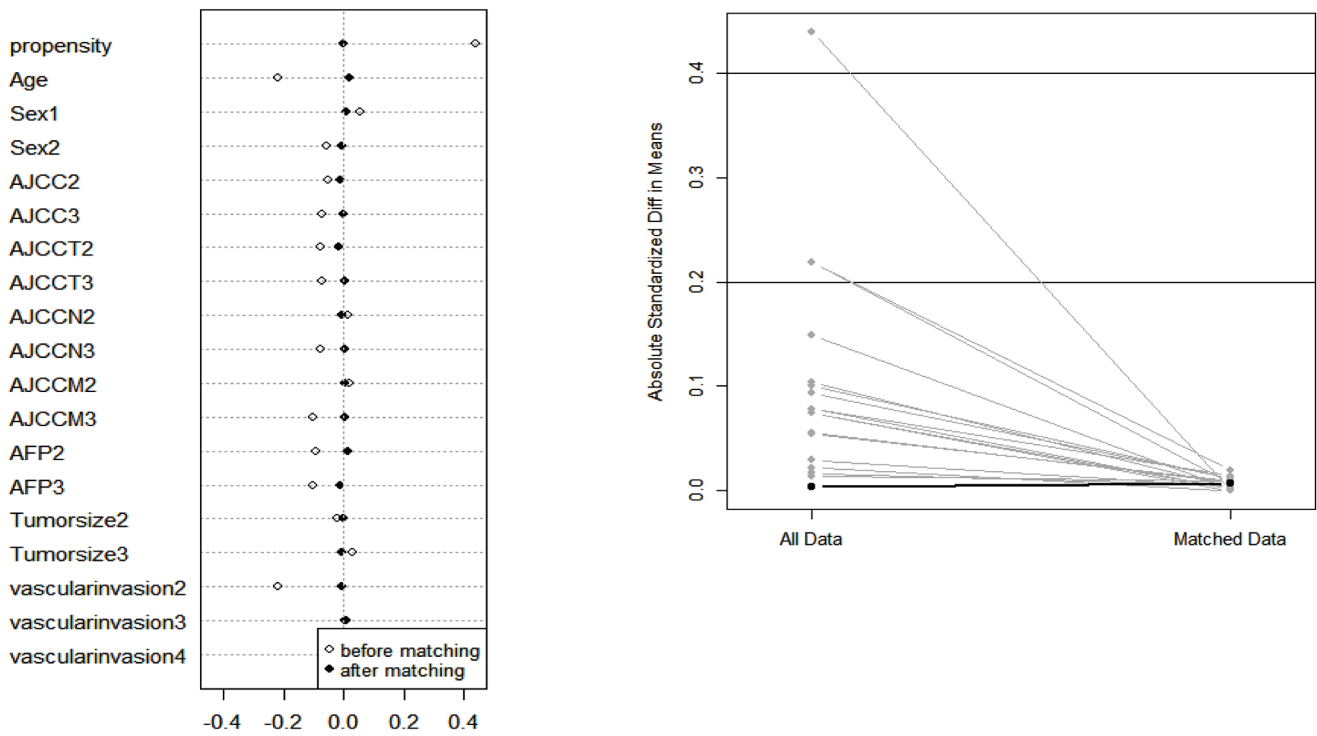

**Figure S1** Propensity score-matched fibrosis subsets in patients with HCC showing well-balanced distribution with no significant differences at baseline. HCC, hepatocellular carcinoma; AJCC, American Joint Cancer Committee; AFP, alpha-fetoprotein.

**Table S1** Total of patients with HCC and varying fibrosis scores after PSM and adjustment of AJCC T staging

| Variables                      | Unclear T stages classified as T1-2 |                |         | Unclear T stages classified as T3-4 |                |         |
|--------------------------------|-------------------------------------|----------------|---------|-------------------------------------|----------------|---------|
|                                | F0-4 (n=1,660)                      | F5-6 (n=1,563) | P value | F0-4 (n=1,660)                      | F5-6 (n=1,563) | P value |
| AJCC T, 7 <sup>th</sup> ed., n |                                     |                | 0.6234  |                                     |                | 0.5007  |
| T1-T2                          | 1,459                               | 1,383          |         | 729                                 | 705            |         |
| T3-T4                          | 201                                 | 180            |         | 931                                 | 858            |         |

HCC, hepatocellular carcinoma; PSM, propensity score matching; AJCC, American Joint Cancer Committee.

**Table S2** Total of patients with HCC and varying fibrosis scores after PSM and adjustment of AJCC M staging

| Variables                      | Unclear M stages classified as M0 |                |         | Unclear M stages classified as M1 |                |         |
|--------------------------------|-----------------------------------|----------------|---------|-----------------------------------|----------------|---------|
|                                | F0-4 (n=1,660)                    | F5-6 (n=1,563) | P value | F0-4 (n=1,660)                    | F5-6 (n=1,563) | P value |
| AJCC M, 7 <sup>th</sup> ed., n |                                   |                | 0.9162  |                                   |                | 0.8321  |
| M0                             | 1,613                             | 1,517          |         | 890                               | 844            |         |
| M1                             | 47                                | 46             |         | 770                               | 719            |         |

HCC, hepatocellular carcinoma; PSM, propensity score matching; AJCC, American Joint Cancer Committee.

**Table S3** Association between adjusted AJCC T staging and OS in patients with HCC after PSM, plotted by Kaplan-Meier method (log-rank test)

| Variables                   | Unclear T stages classified as T1–2 |                                        |         | Unclear T stages classified as T3–4 |                                        |         |
|-----------------------------|-------------------------------------|----------------------------------------|---------|-------------------------------------|----------------------------------------|---------|
|                             | All patients                        | Survival time (months) median (95% CI) | P value | All patients                        | Survival time (months) median (95% CI) | P value |
| AJCC T, 7 <sup>th</sup> ed. |                                     |                                        | <0.001  |                                     |                                        | <0.001  |
| T1–T2                       | 2,842                               | 37 (33.798–40.202)                     |         | 1,434                               | 56                                     |         |
| T3–T4                       | 381                                 | 9 (7.077–10.923)                       |         | 1,789                               | 19 (16.854–21.146)                     |         |

AJCC, American Joint Cancer Committee; OS, overall survival; HCC, hepatocellular carcinoma; PSM, propensity score matching.

**Table S4** Association between adjusted AJCC M staging and OS in patients with HCC after PSM, plotted by Kaplan-Meier method (log-rank test)

| Variables                   | Unclear M stages classified as M0 |                                        |         | Unclear M stages classified as M1 |                                        |         |
|-----------------------------|-----------------------------------|----------------------------------------|---------|-----------------------------------|----------------------------------------|---------|
|                             | All patients                      | Survival time (months) median (95% CI) | P value | All patients                      | Survival time (months) median (95% CI) | P value |
| AJCC M, 7 <sup>th</sup> ed. |                                   |                                        | <0.001  |                                   |                                        | <0.001  |
| M0                          | 3,130                             | 33 (30.318–35.682)                     |         | 1,734                             | 42 (37.38–46.62)                       |         |
| M1                          | 93                                | 4 (3.191–4.809)                        |         | 1,489                             | 21 (18.404–23.596)                     |         |

AJCC, American Joint Cancer Committee; OS, overall survival; HCC, hepatocellular carcinoma; PSM, propensity score matching.

**Table S5** Multivariate analysis of factors predicting patient OS, after PSM and adjustment of AJCC T staging

| Variables                                    | Unclear T stages classified as T1–2 |         | Unclear T stages classified as T3–4 |         |
|----------------------------------------------|-------------------------------------|---------|-------------------------------------|---------|
|                                              | HR (95% CI)                         | P value | HR (95% CI)                         | P value |
| Group, F5–6 (vs. F0–4)                       | 1.131 (1.032–1.240)                 | 0.009   | 1.131 (1.032–1.240)                 | 0.009   |
| Age, >63 (vs. ≤63)                           | 1.366 (1.244–1.499)                 | <0.001  | 1.365 (1.243–1.498)                 | <0.001  |
| Sex, female (vs. male)                       |                                     |         |                                     |         |
| AJCC T, 7 <sup>th</sup> ed., T3–4 (vs. T1–2) | 1.799 (1.510–2.143)                 | <0.001  | 1.769 (1.487–2.105)                 | <0.001  |
| AJCC N, 7 <sup>th</sup> ed., N1 (vs. N0)     |                                     |         |                                     |         |
| AJCC M, 7 <sup>th</sup> ed., M1 (vs. M0)     | 3.498 (2.744–4.460)                 | <0.001  | 3.397 (2.659–4.341)                 | <0.001  |
| Tumor size, ≤1 cm (vs. >1 cm)                | 2.574 (2.143–3.091)                 | <0.001  | 2.428 (2.025–2.912)                 | <0.001  |
| Vascular invasion, minor (vs. absent)        | 1.203 (1.001–1.446)                 | 0.049   | 1.201 (0.999–1.443)                 | 0.052   |
| Vascular invasion, major (vs. absent)        | 2.321 (1.886–2.858)                 | <0.001  | 2.364 (1.924–2.904)                 | <0.001  |
| AFP, negative (vs. positive/elevated)        | 0.661 (0.586–0.746)                 | <0.001  | 0.661 (0.586–0.746)                 | <0.001  |

OS, overall survival; PSM, propensity score matching; AJCC, American Joint Cancer Committee; HR, hazard ratio; CI, confidence interval; AFP, alpha-fetoprotein.

**Table S6** Multivariate analysis of factors predicting patient OS, after PSM and adjustment of AJCC M staging

| Variables                                    | Unclear M stages classified as M0 |         | Unclear M stages classified as M1 |         |
|----------------------------------------------|-----------------------------------|---------|-----------------------------------|---------|
|                                              | HR (95% CI)                       | P value | HR (95% CI)                       | P value |
| Group, F5–6 (vs. F0–4)                       | 1.131 (1.032–1.240)               | 0.009   | 1.131 (1.031–1.240)               | 0.009   |
| Age, >63 (vs. ≤63)                           | 1.369 (1.247–1.502)               | <0.001  | 1.365 (1.244–1.499)               | <0.001  |
| Sex, female (vs. male)                       |                                   |         |                                   |         |
| AJCC T, 7 <sup>th</sup> ed., T3–4 (vs. T1–2) | 1.847 (1.537–2.220)               | <0.001  | 1.827 (1.532–2.179)               | <0.001  |
| AJCC N, 7 <sup>th</sup> ed., N1 (vs. N0)     |                                   |         |                                   |         |
| AJCC M, 7 <sup>th</sup> ed., M1 (vs. M0)     | 2.801 (2.156–3.640)               | <0.001  | 3.241 (2.522–4.164)               | <0.001  |
| Tumor size, ≤1 cm (vs. >1 cm)                | 2.464 (2.051–2.959)               | <0.001  | 2.671 (2.223–3.210)               | <0.001  |
| Vascular invasion, minor (vs. absent)        | 1.187 (0.987–1.427)               | 0.069   | 1.205 (1.003–1.449)               | 0.047   |
| Vascular invasion, major (vs. absent)        | 2.370 (1.930–2.910)               | <0.001  | 2.308 (1.875–2.841)               | <0.001  |
| AFP, negative (vs. positive/elevated)        | 0.664 (0.589–0.749)               | <0.001  | 0.660 (0.586–0.745)               | <0.001  |

OS, overall survival; PSM, propensity score matching; AJCC, American Joint Cancer Committee; HR, hazard ratio; CI, confidence interval; AFP, alpha-fetoprotein.
